# Supplementary material for: The first asymmetric total synthesis of lycoposerramine-R
Source: Royal Society of Chemistry journal article supplement (doi:10.1039/c5ob00827a), 2015-01-01

Supplementary information

**First asymmetric total synthesis of lycoserramine-R**

Hiroaki Ishida, Shinya Kimura, Noriyuki Kogure, Mariko Kitajima and Hiromitsu Takayama\*

takayamah@faculty.chiba-u.jp

*Graduate School of Pharmaceutical Sciences, Chiba University, 1-8-1 Inohana, Chuo-ku,  
Chiba 260-8675, Japan*

Copies of  $^1\text{H}$  and  $^{13}\text{C}$  NMR spectral data for synthetic (–)-lycoserramine-R (**1**), compounds **2-4**, **7**, **8**, **12-19**, and **23**.

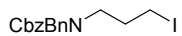

<sup>1</sup>H NMR of **7**  
(400 MHz, in CDCl<sub>3</sub> at 55 °C)

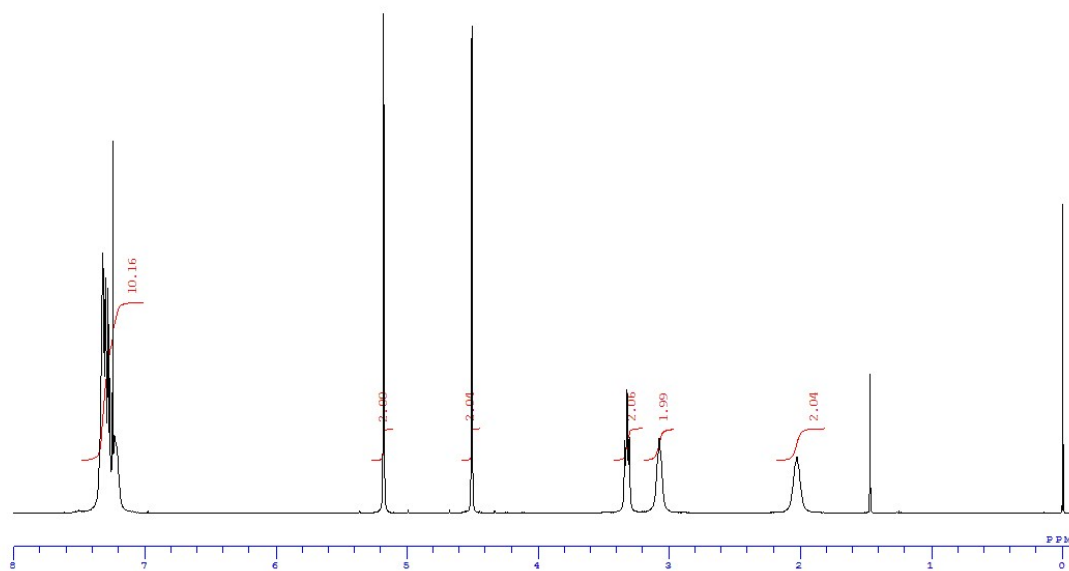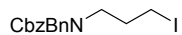

<sup>13</sup>C NMR of **7**  
(100 MHz, in CDCl<sub>3</sub> at 55 °C)

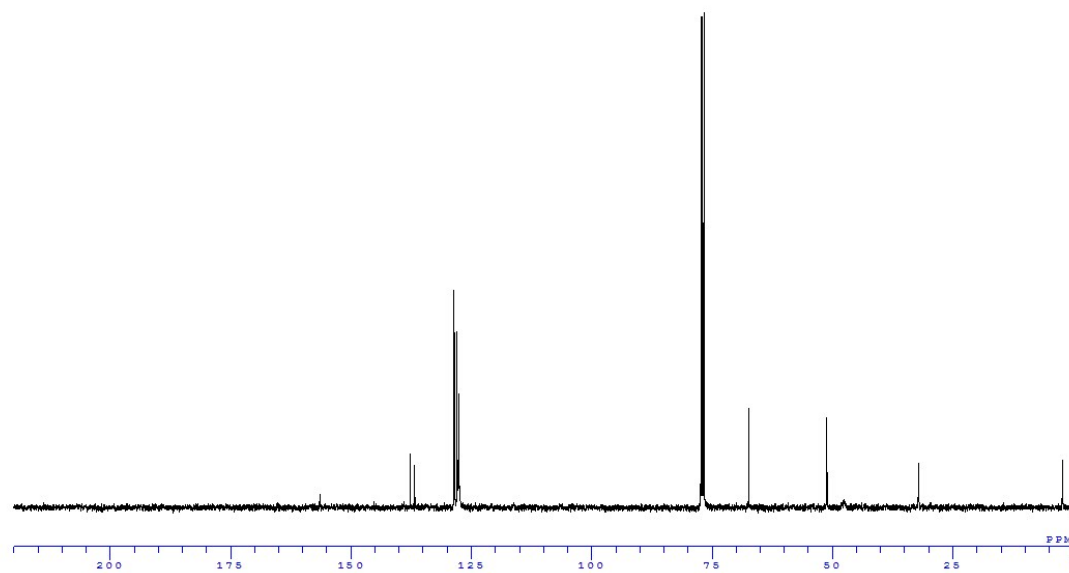

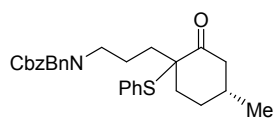

<sup>1</sup>H NMR of **8**  
(600 MHz, in CDCl<sub>3</sub> at 55 °C)

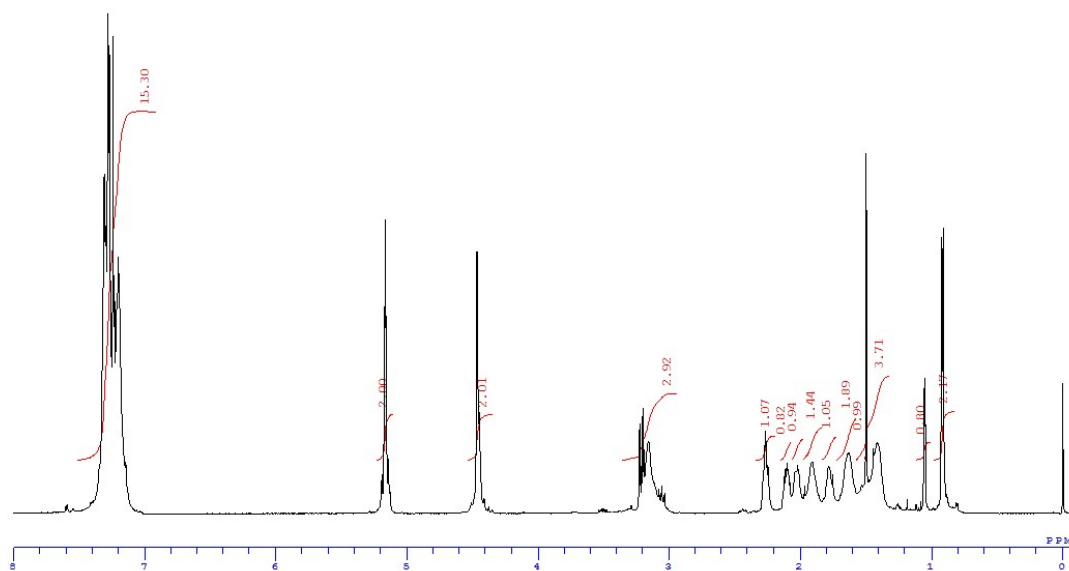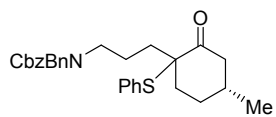

<sup>13</sup>C NMR of **8**  
(150 MHz, in CDCl<sub>3</sub> at 55 °C)

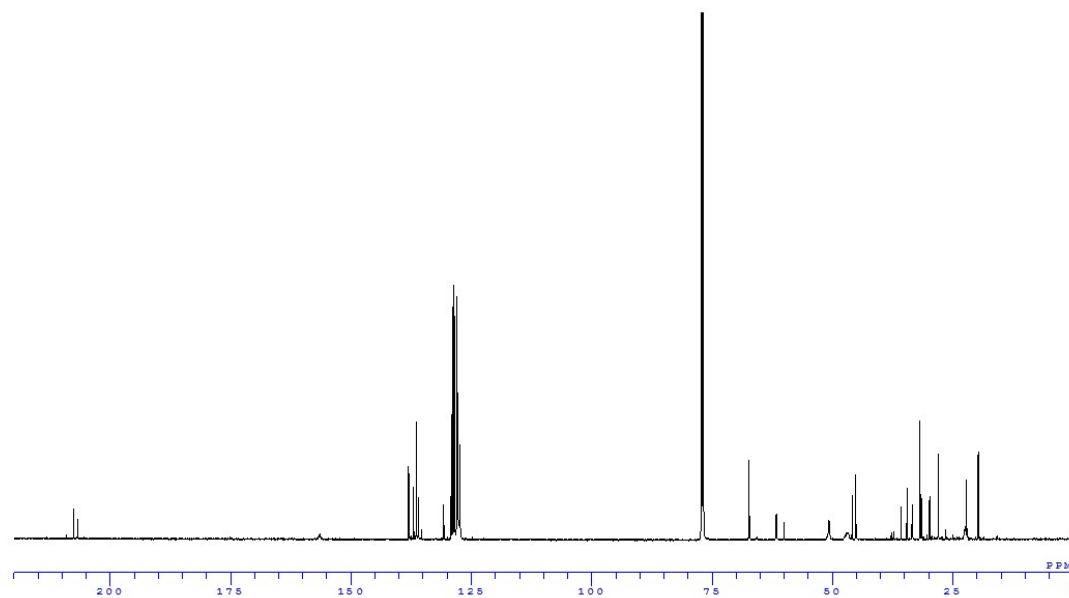

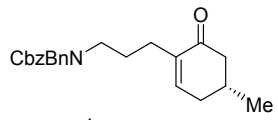

<sup>1</sup>H NMR of 4  
 (400 MHz, in CDCl<sub>3</sub> at 55 °C)

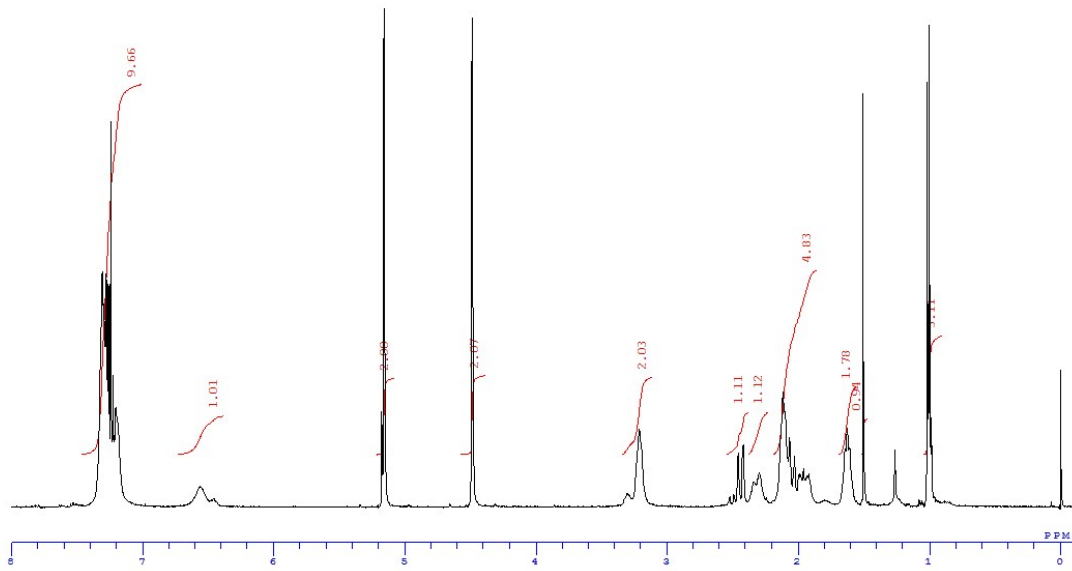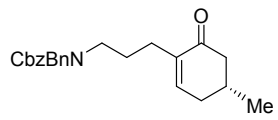

<sup>13</sup>C NMR of 4  
 (150 MHz, in CDCl<sub>3</sub> at 55 °C)

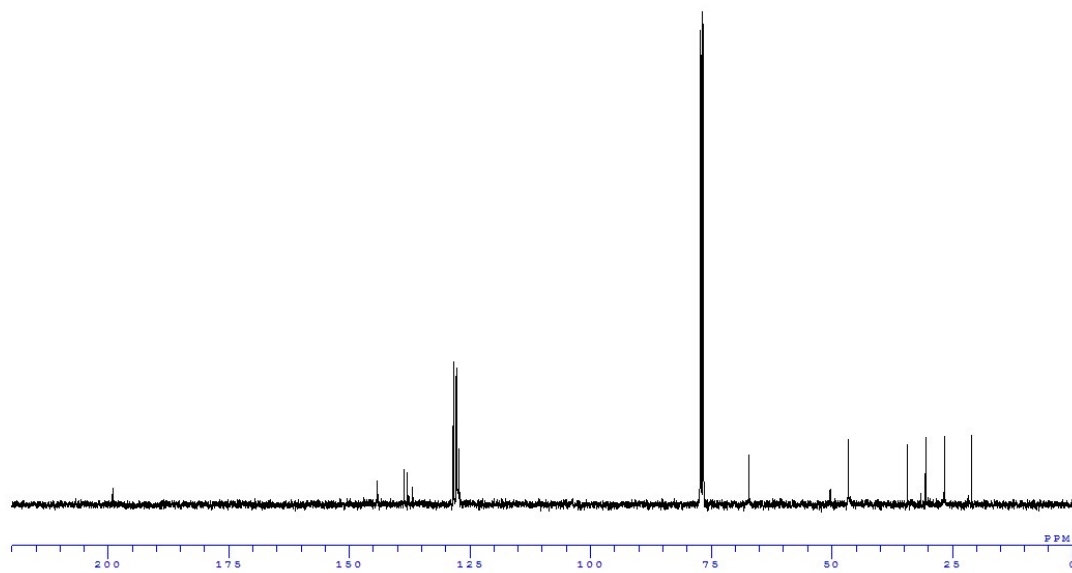

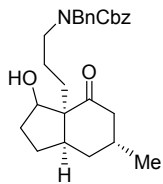

<sup>1</sup>H NMR of **12**  
(400 MHz, in CDCl<sub>3</sub> at 55 °C)

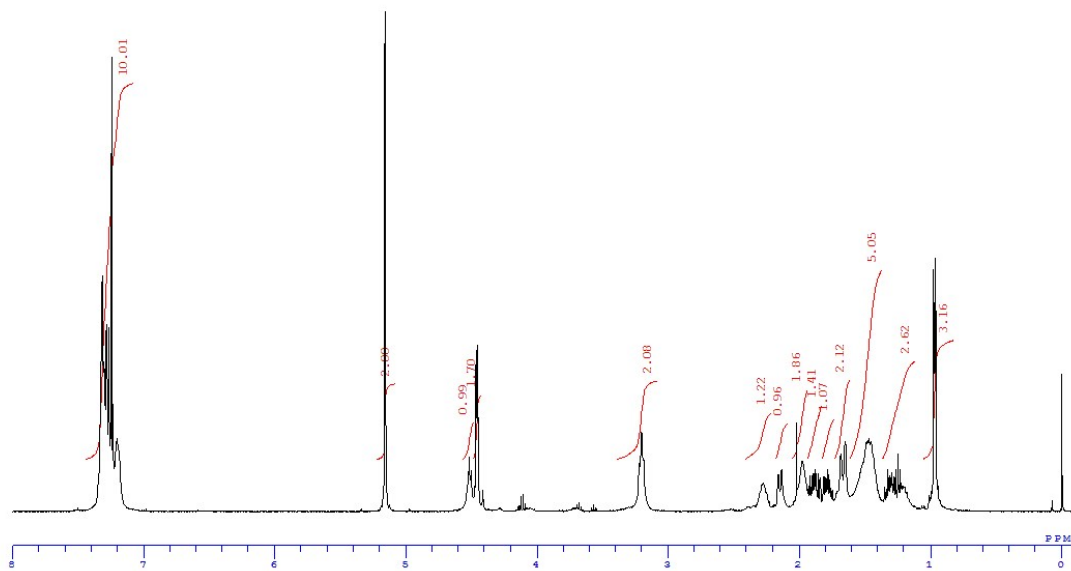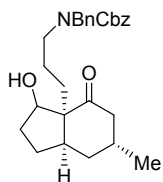

<sup>13</sup>C NMR of **12**  
(100 MHz, in CDCl<sub>3</sub> at 55 °C)

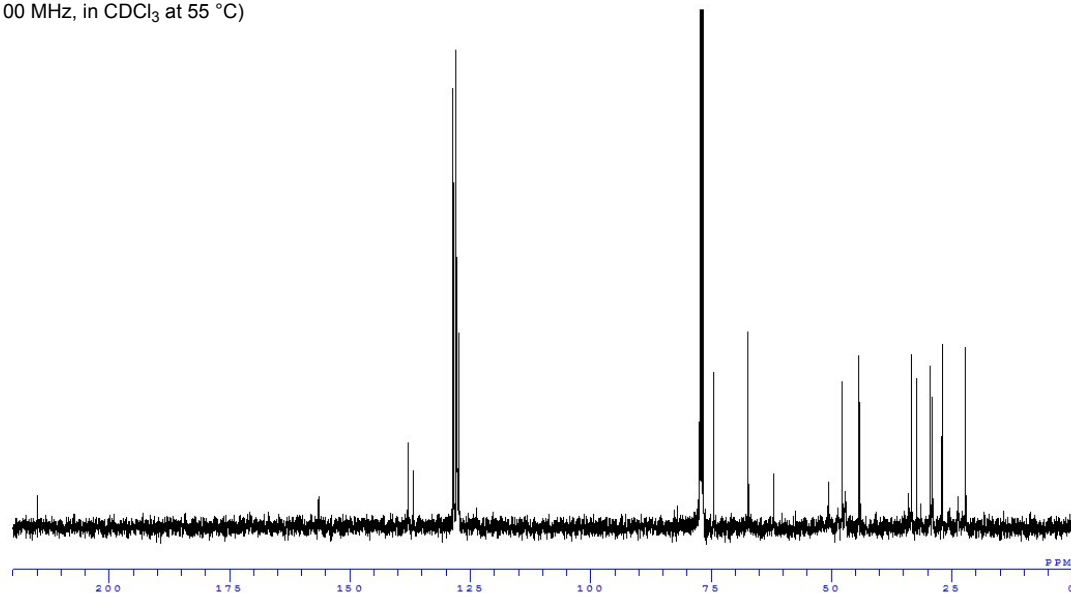

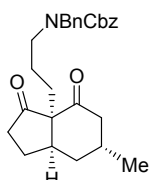

**<sup>1</sup>H NMR of 3**  
(600 MHz, in CDCl<sub>3</sub> at 55 °C)

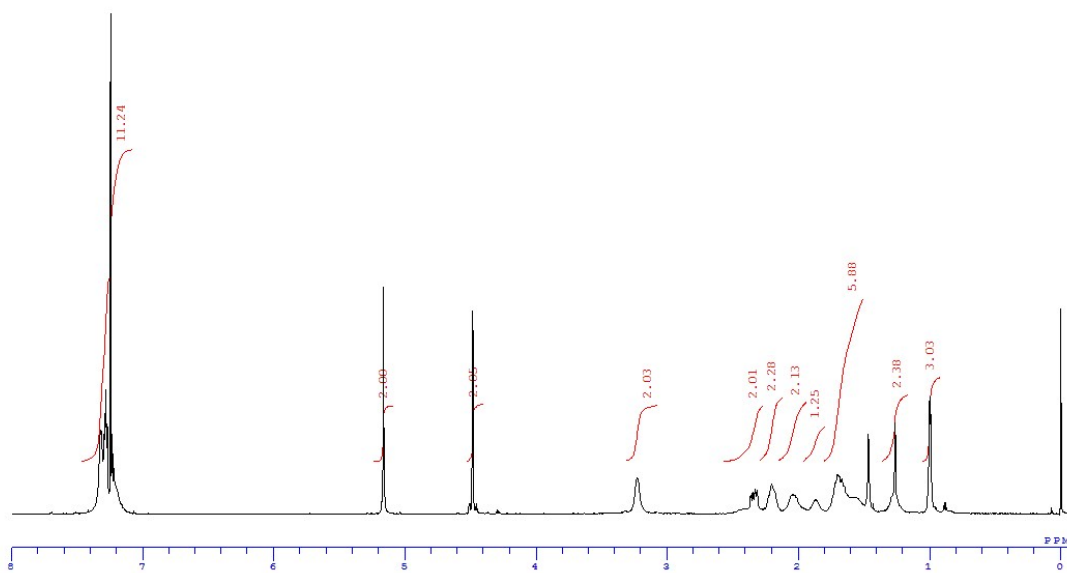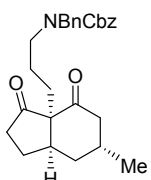

**<sup>13</sup>C NMR of 3**  
(150 MHz, in CDCl<sub>3</sub> at 55 °C)

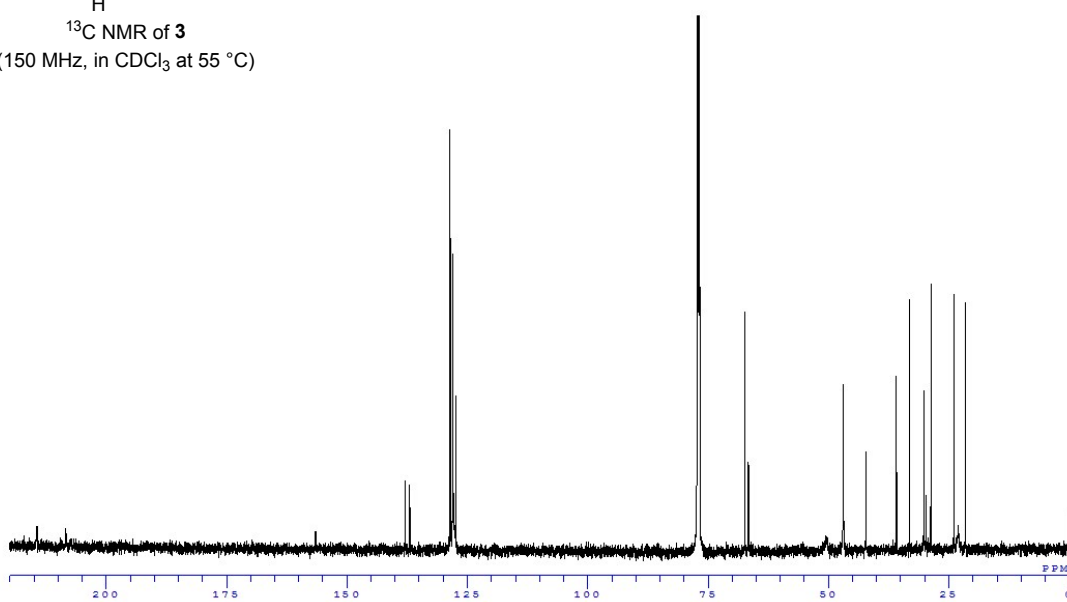

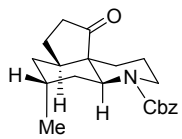

<sup>1</sup>H NMR of 2  
(400 MHz, in CDCl<sub>3</sub> at rt)

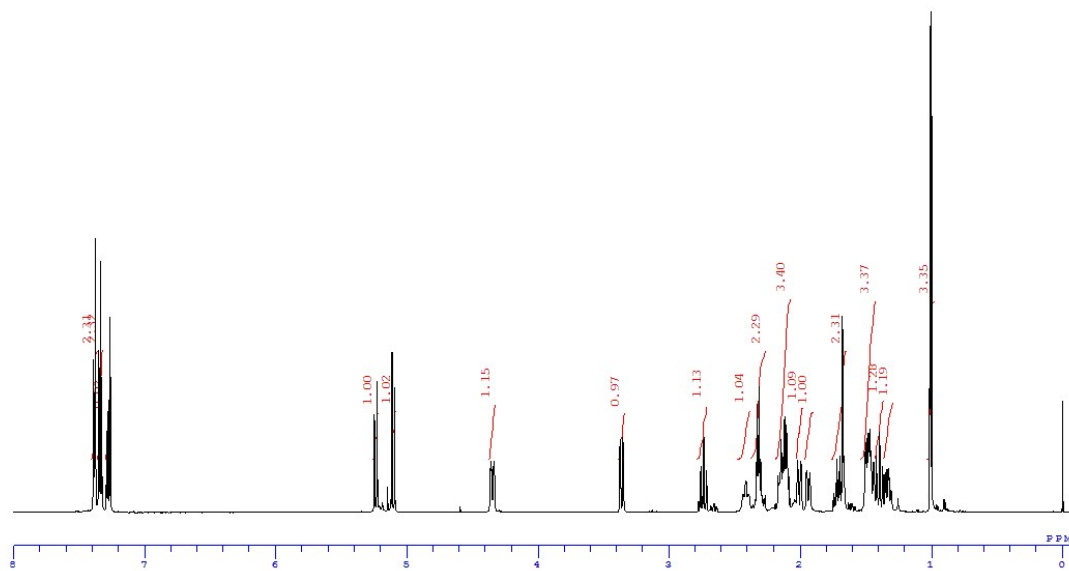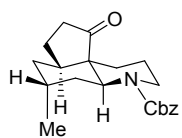

<sup>13</sup>C NMR of 2  
(100 MHz, in CDCl<sub>3</sub> at rt)

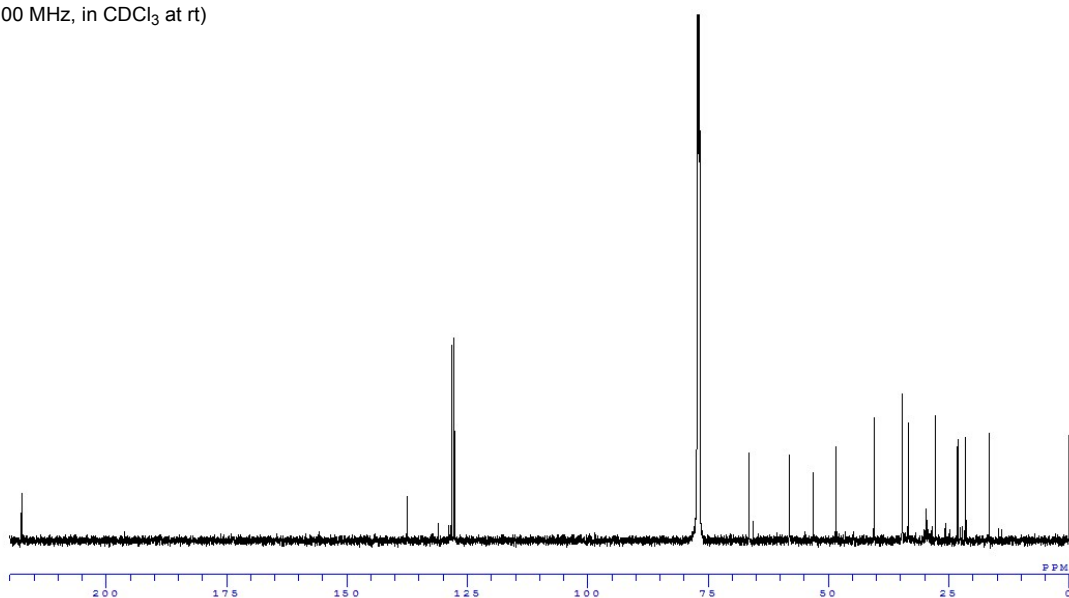

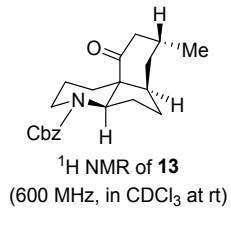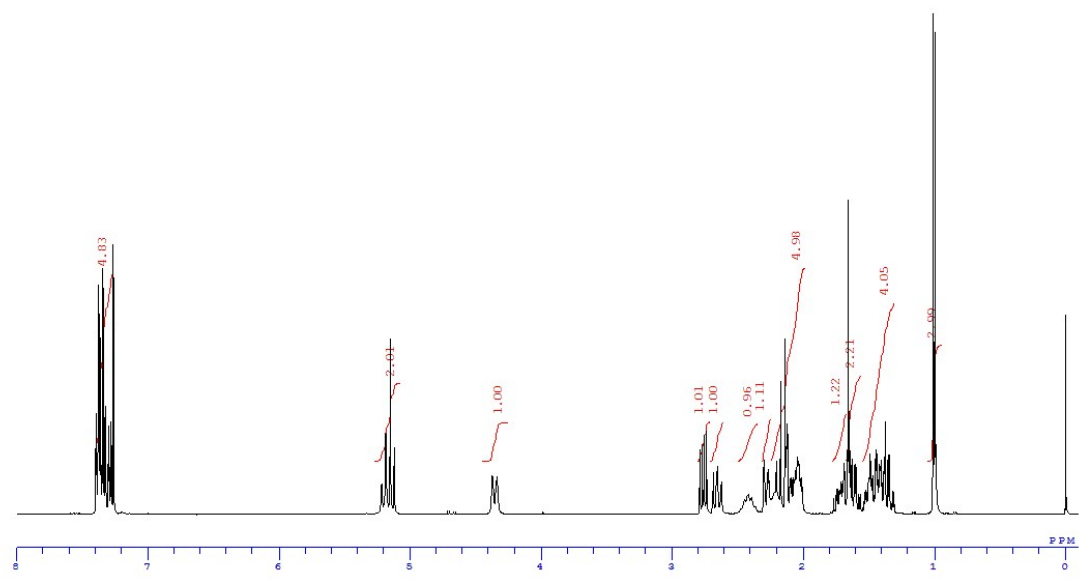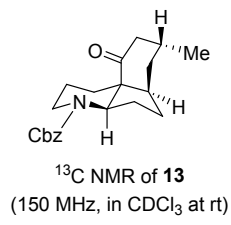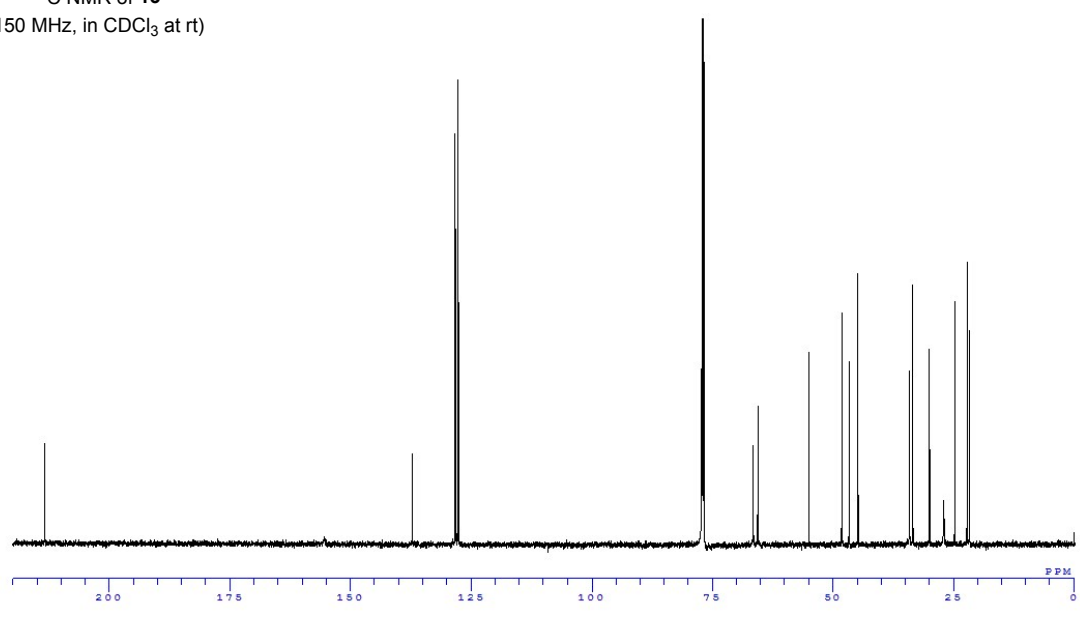



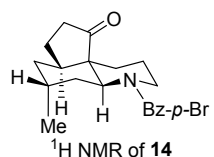

(400 MHz, in CDCl<sub>3</sub> at rt)

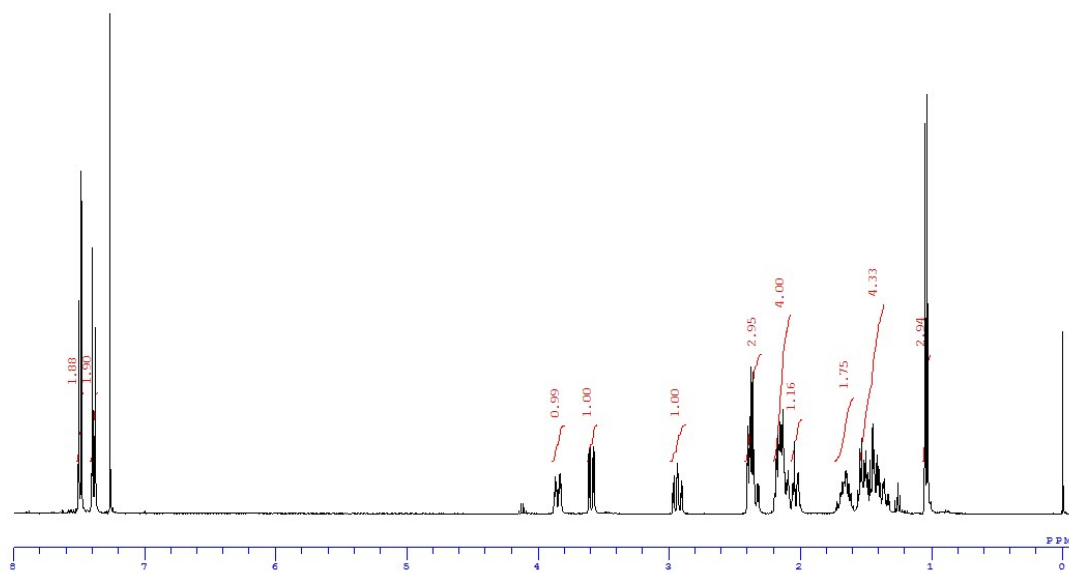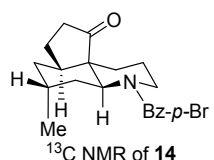

(150 MHz, in CDCl<sub>3</sub> at rt)

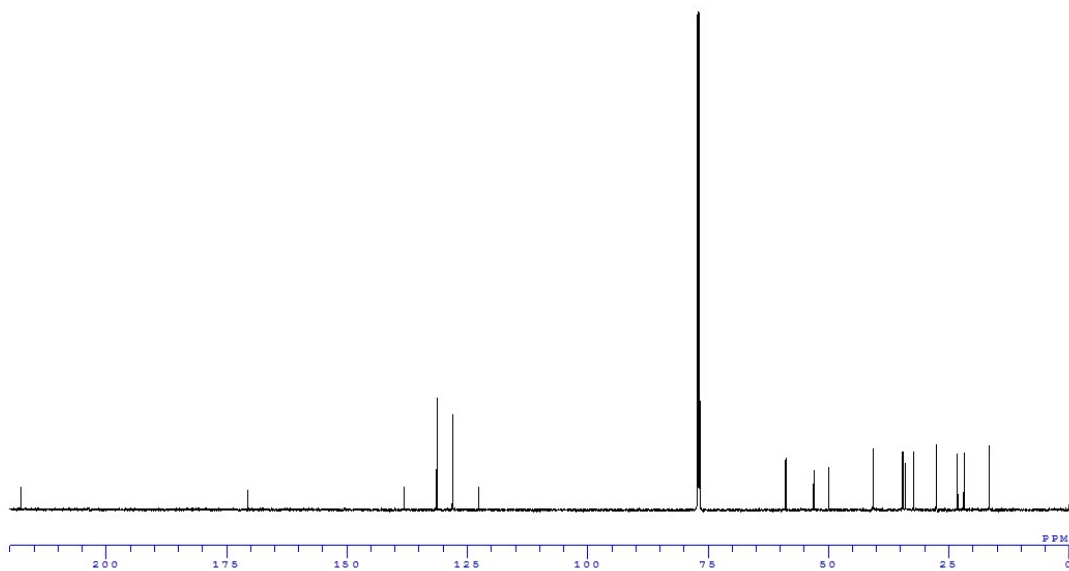

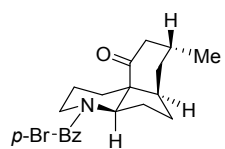

<sup>1</sup>H NMR of **15**  
(400 MHz, in CDCl<sub>3</sub> at rt)

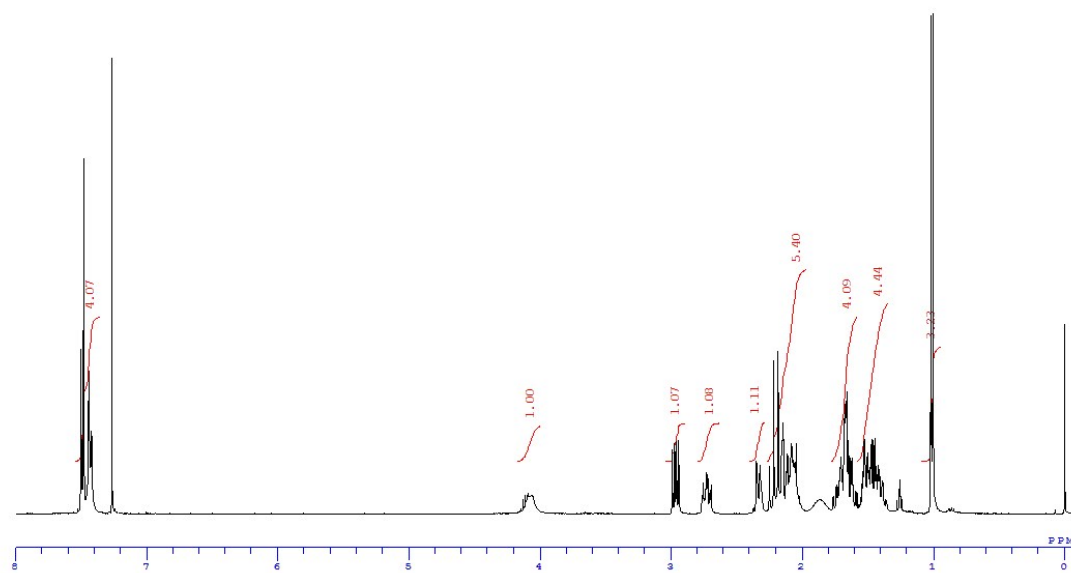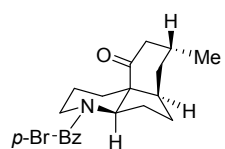

<sup>13</sup>C NMR of **15**  
(150 MHz, in CDCl<sub>3</sub> at rt)

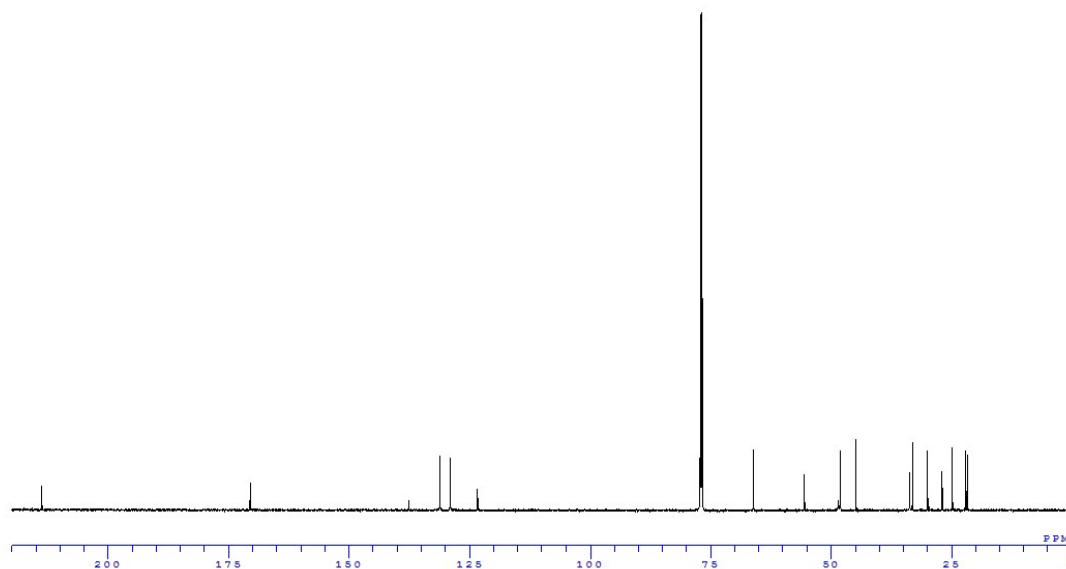

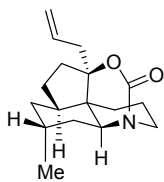

<sup>1</sup>H NMR of **16**  
(600 MHz, in CDCl<sub>3</sub> at rt)

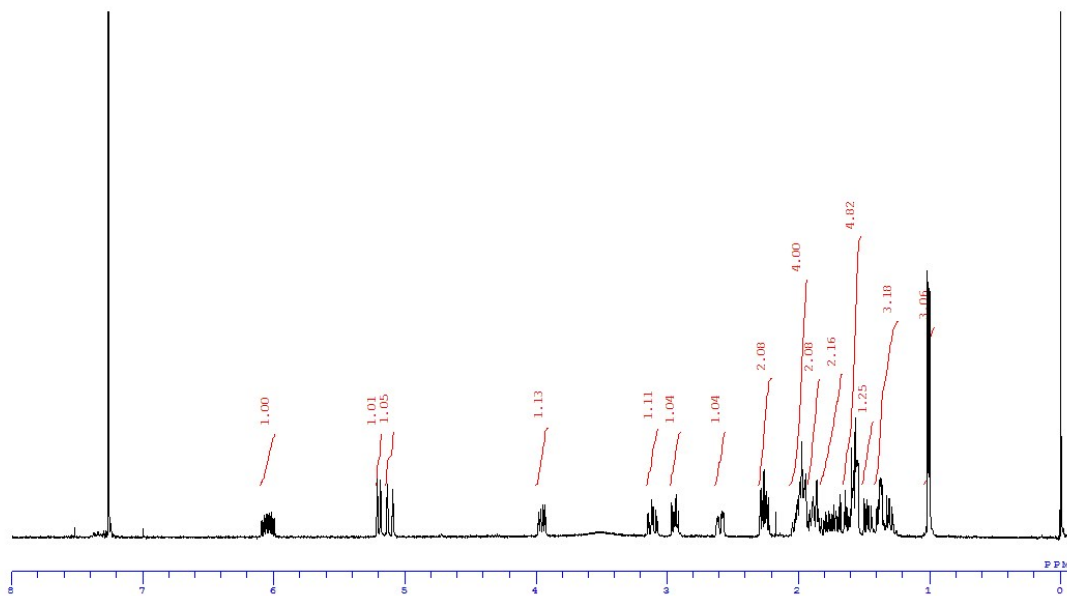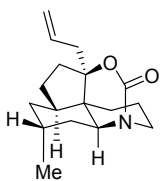

<sup>13</sup>C NMR of **16**  
(150 MHz, in CDCl<sub>3</sub> at rt)

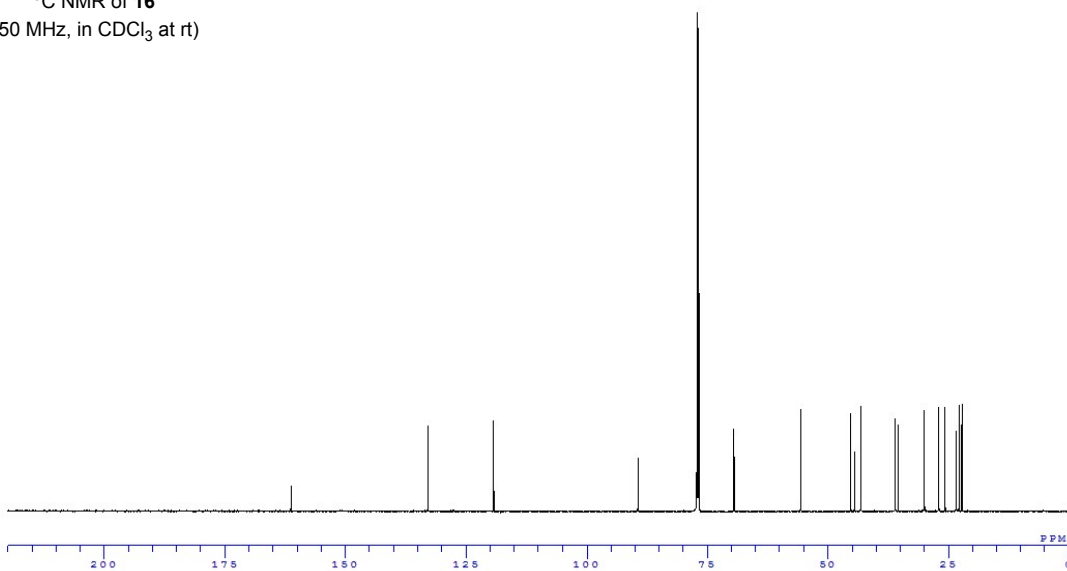

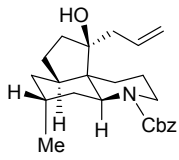

<sup>1</sup>H NMR of 17  
(400 MHz, in CDCl<sub>3</sub> at rt)

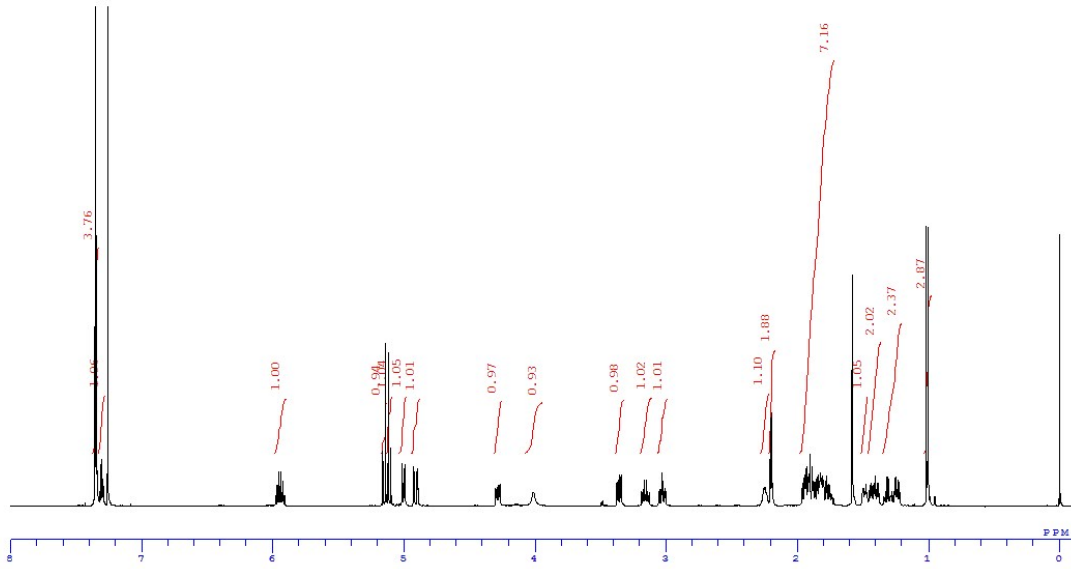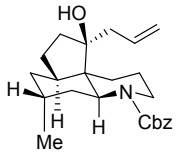

<sup>13</sup>C NMR of 17  
(150 MHz, in CDCl<sub>3</sub> at rt)

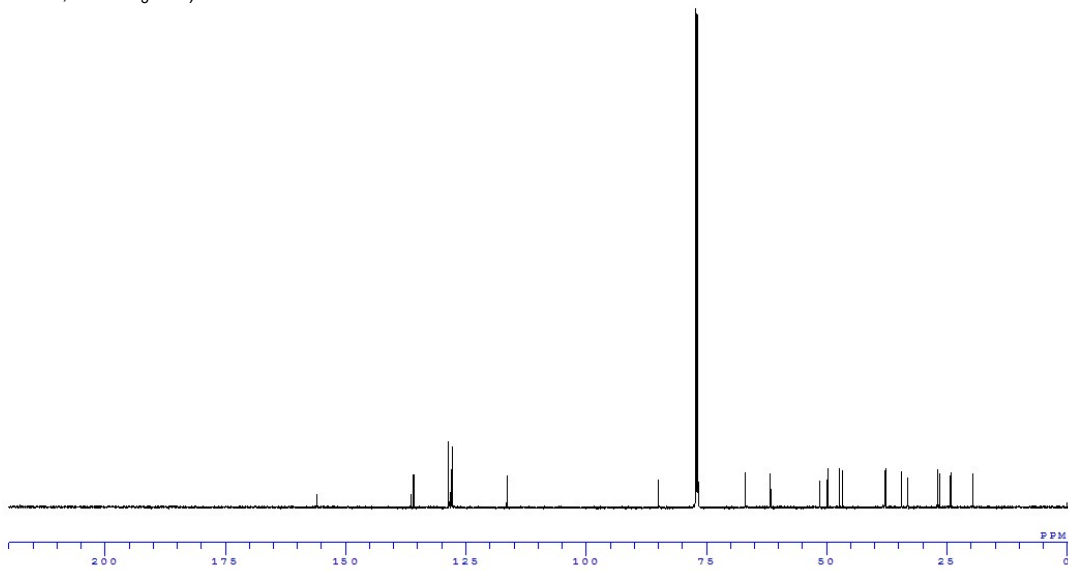

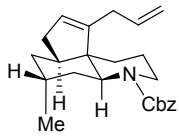

<sup>1</sup>H NMR of **18**  
(600 MHz, in CDCl<sub>3</sub> at rt)

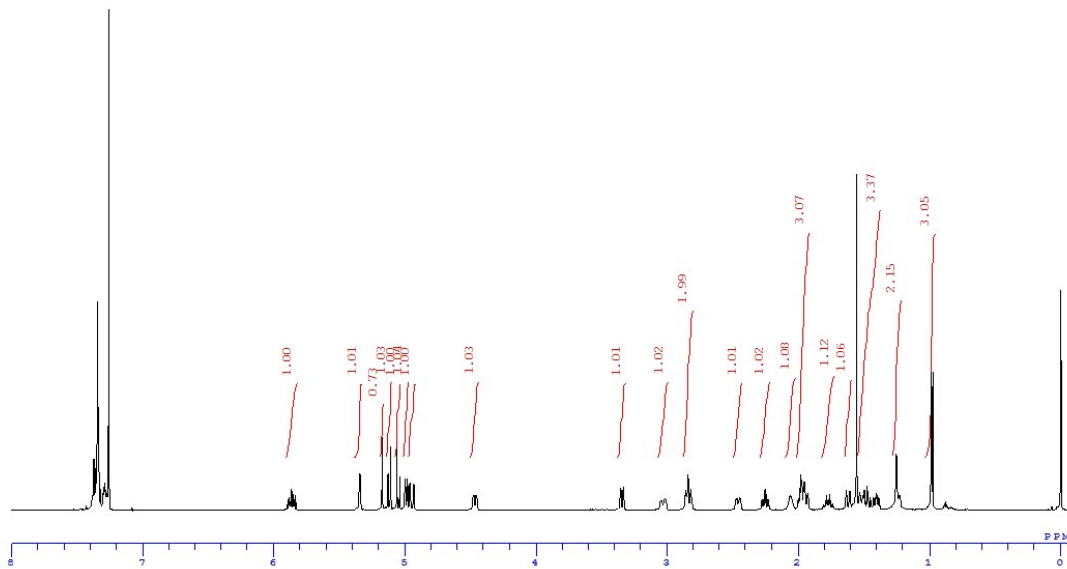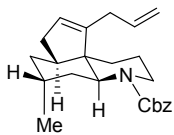

<sup>13</sup>C NMR of **18**  
(150 MHz, in CDCl<sub>3</sub> at rt)

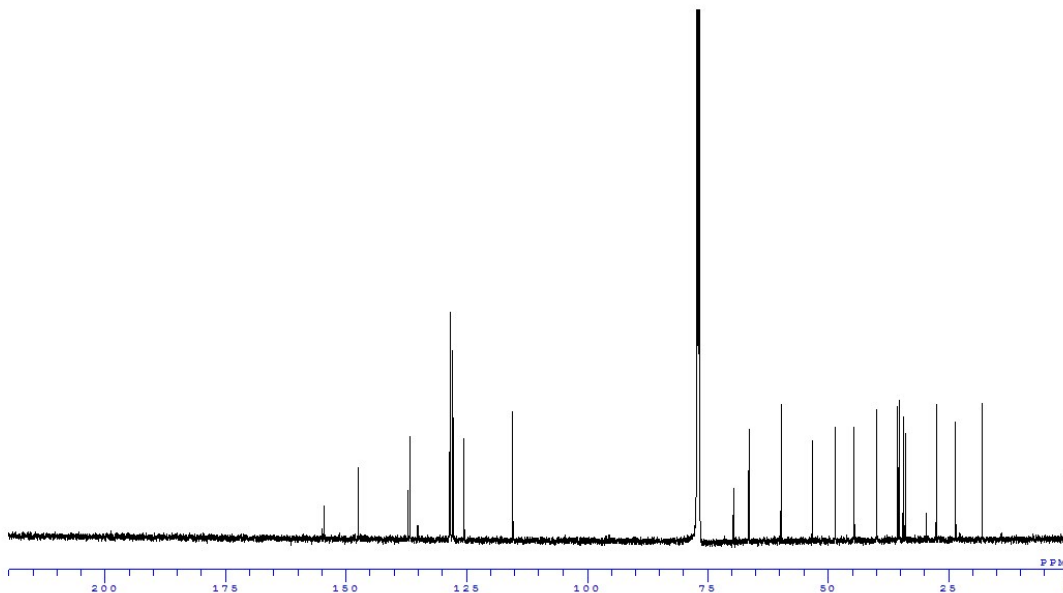

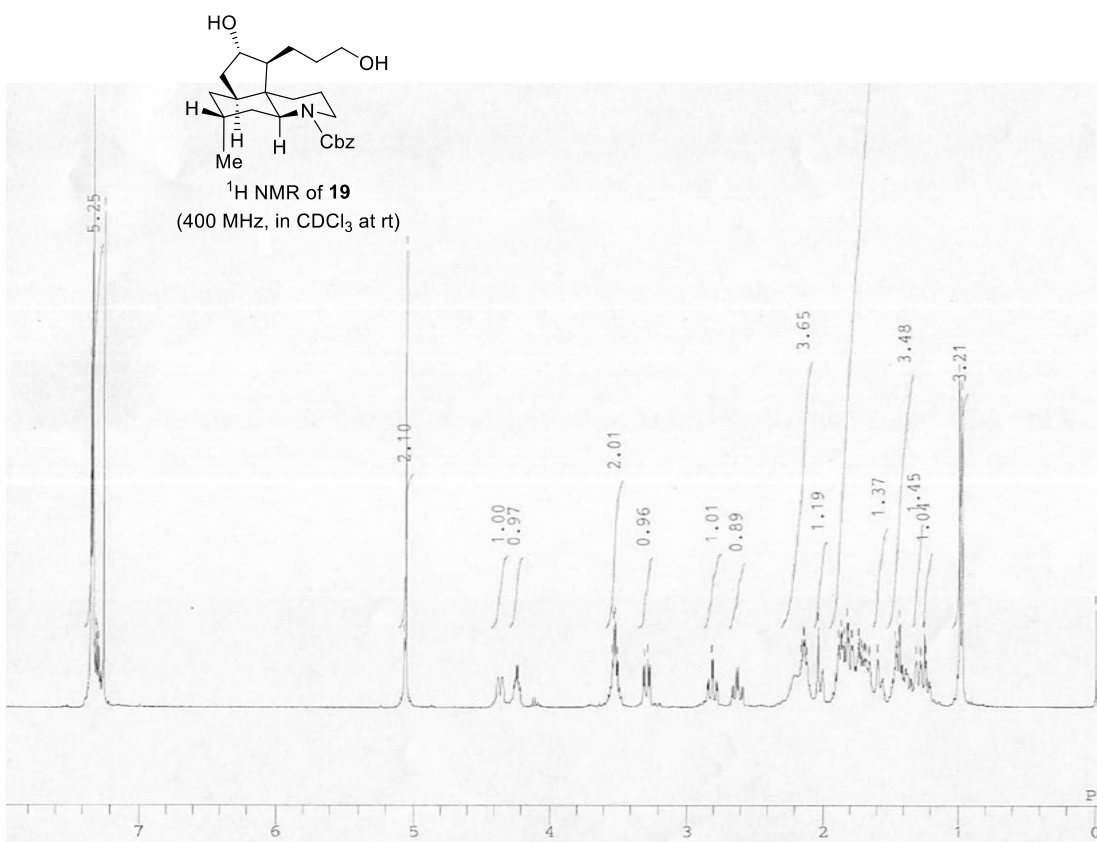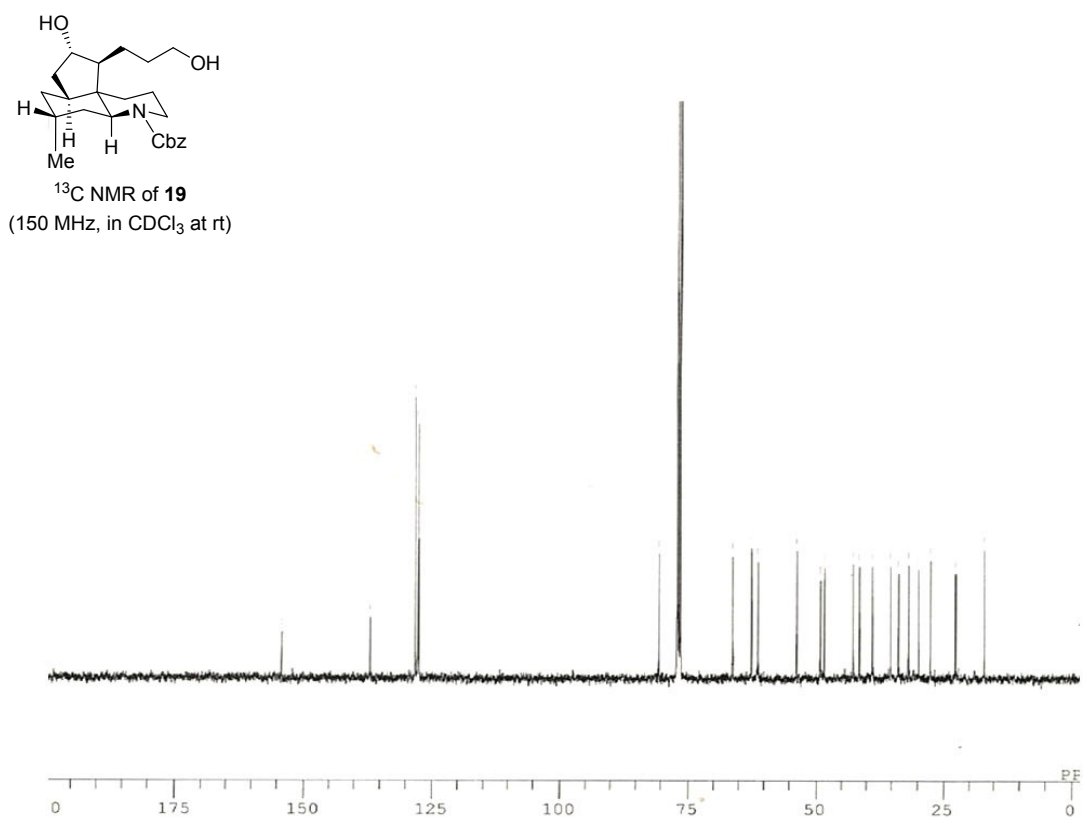

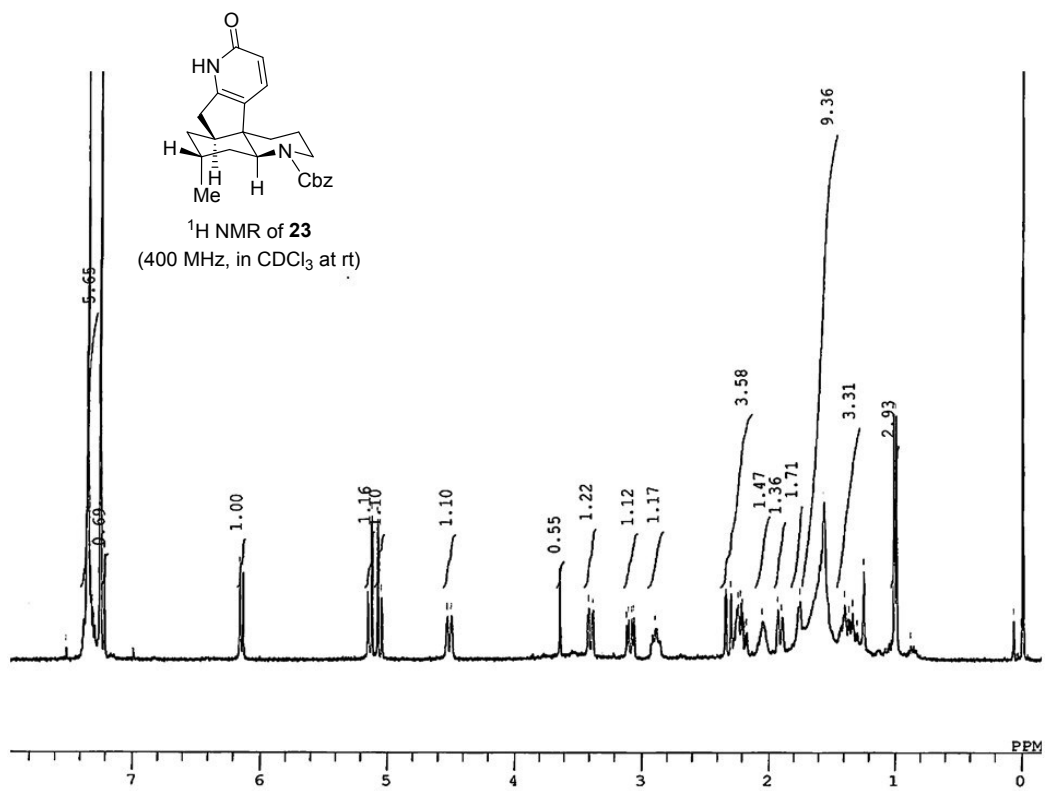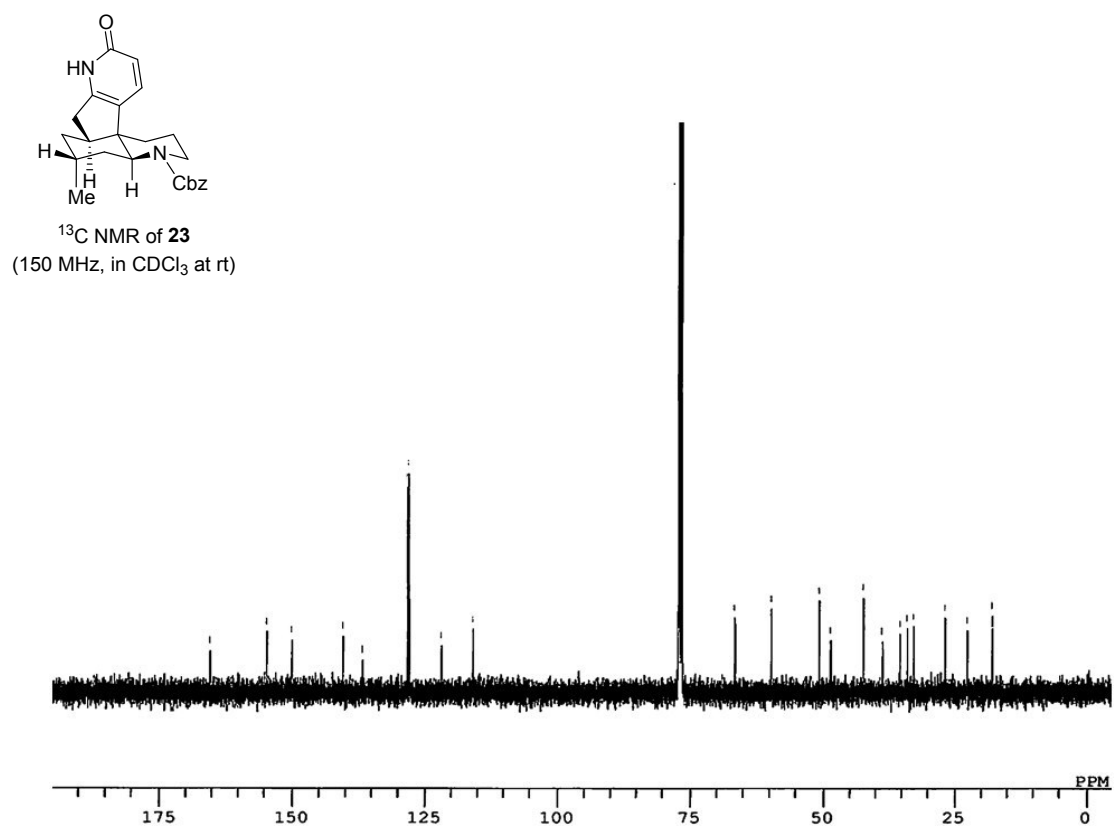

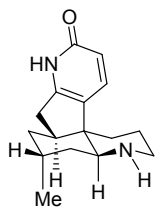

$^1\text{H}$  NMR of (-)-lycoposerramine-R (1)  
(600 MHz, in  $\text{CDCl}_3$  at rt)

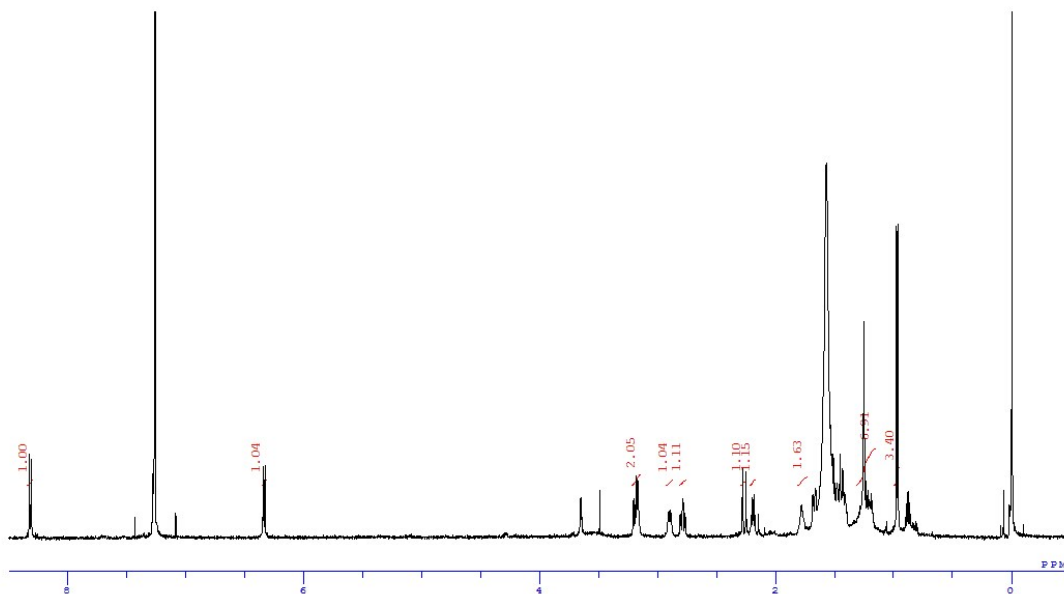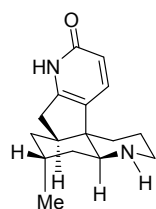

$^{13}\text{C}$  NMR of (-)-lycoposerramine-R (1)  
(150 MHz, in  $\text{CDCl}_3$  at rt)

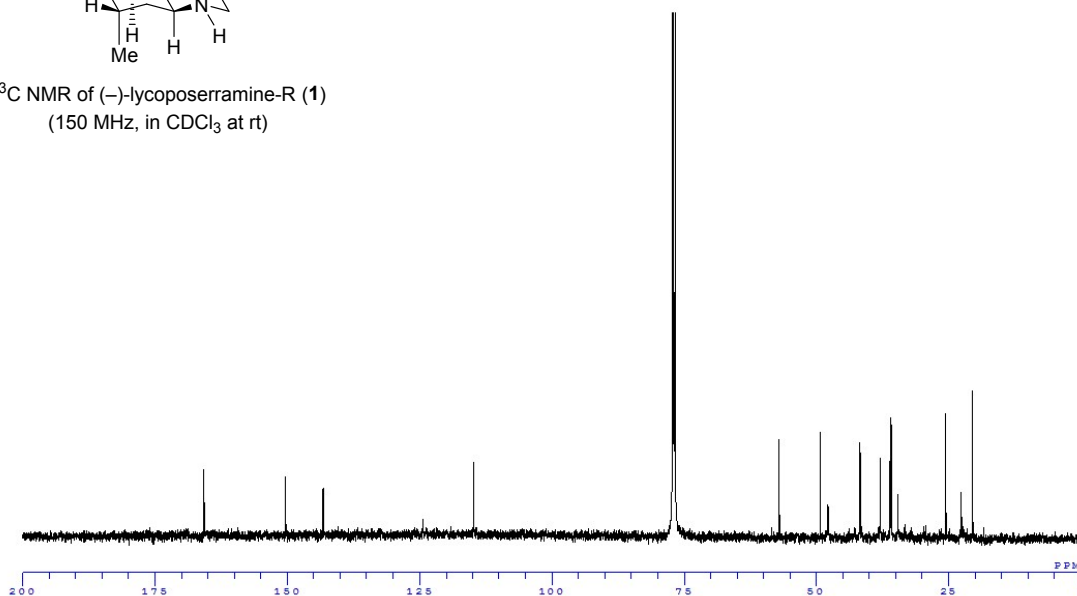

Supplement: c5ob00827a1.pdf [file c5ob00827a1.pdf]
